# Supplementary material for: A Strategy for Direct Mapping and Identification of Mutations by Whole-Genome Sequencing
Source: Oxford University Press journal article supplement (doi:10.1534/genetics.110.119230), 2010-07-08
Supplement: 119230_si.pdf [file 119230_si.pdf]

# GENETICS

## **Supporting Information**

<http://www.genetics.org/cgi/content/full/genetics.110.119230/DC1>

## **A Strategy for Direct Mapping and Identification of Mutations by Whole-Genome Sequencing**

**Steven Zuryn, Stéphanie Le Gras, Karine Jamet and Sophie Jarriault**

Copyright © 2010 by the Genetics Society of America  
DOI: 10.1534/genetics.110.119230

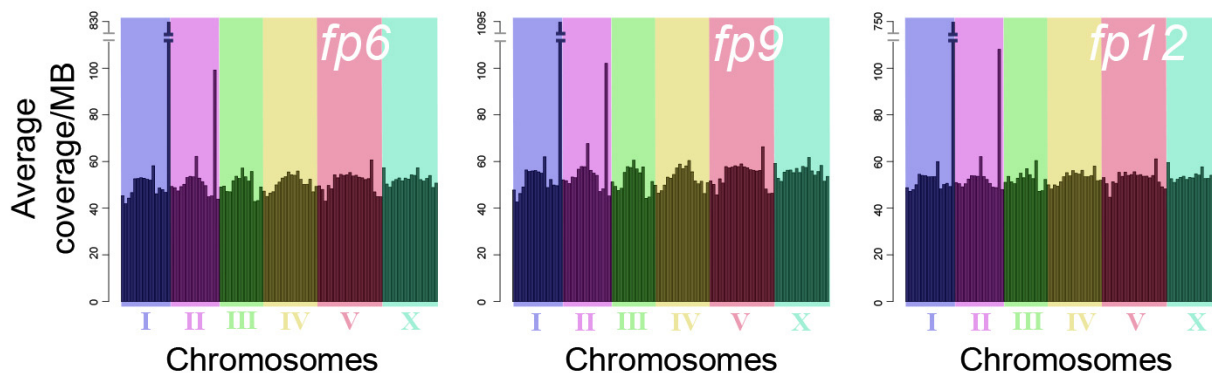

FIGURE S1.—Distribution of deep sequencing coverage. For each mutant (*fp6*, *fp9*, and *fp12*), average coverage of each nucleotide per MB is shown across all chromosomes for combined 2-lanes paired-end data. The large peak at the very end of chromosome I may represent a highly repetitive element aligned to only a single location (within 1MB). The large peak on chromosome II maps to the location of the *cog-1* gene. This most likely corresponds to sequencing of the *cog-1::gfp* transgene integrated into the background strain PS3662. Subsequent alignment to the native *cog-1* sequence would thus over-represent coverage in this region.

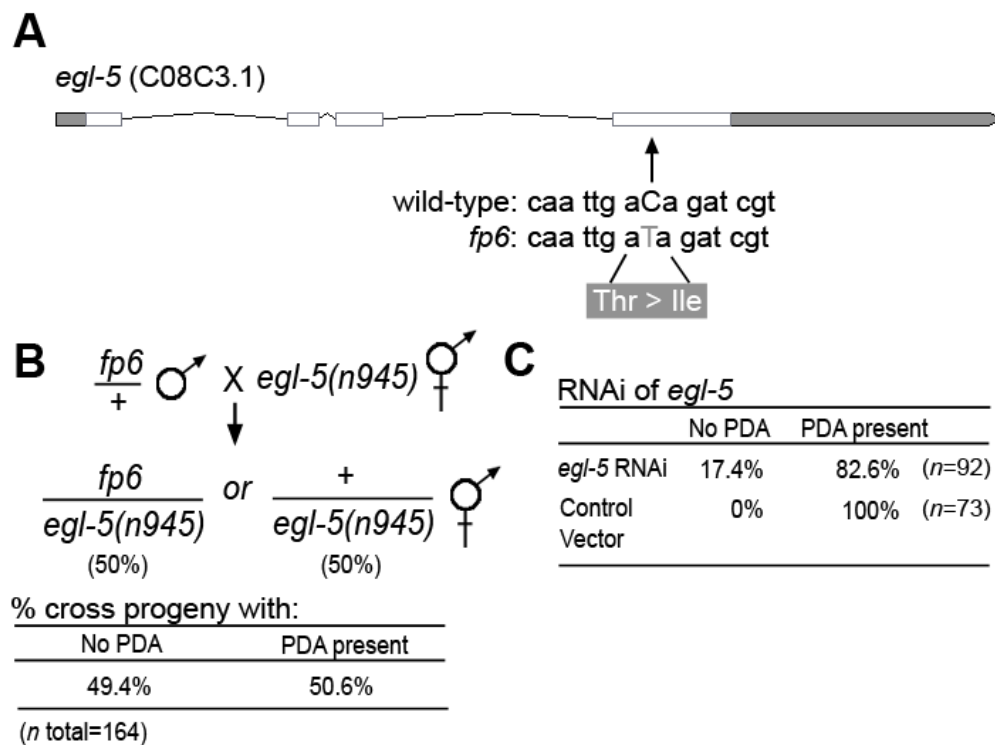

FIGURE S2.—Confirmation of *egl-5(fp6)* mutation. (A) Sanger sequencing revealed a C to T substitution in the same position of *egl-5* exon 4 as did WGS, resulting in a Threonine to Isoleucine amino acid change. The affected amino acid is a conserved residue in the highly conserved Hox domain of EGL-5. (B) *fp6* and the null allele *egl-5(n945)* did not complement for the Y-to-PDA defective phenotype confirming that *fp6* affects the *egl-5* gene and that it is the causal mutation for the “no PDA” phenotype. Both *fp6* and *egl-5(n945)* are recessive. Homozygotes for *fp6* and *egl-5(n945)* are approximately 100% penetrant for the defective Y-to-PDA phenotype. Hermaphrodite progeny from the cross between *fp6/+* and *egl-5(n945)* were identified by the presence of *cog-1::gfp* transgene initially carried by *fp6/+* males. Three separate crosses yielded the same result. (C) Lowering the activity of *egl-5* by RNAi results in a “no PDA” phenotype, which phenocopies the *fp6* mutants. *n* = 164 for (B) and *n* = 165 for (C). Control animals were fed an empty RNAi vector. *n* = total number of animals scored.

**FILE S1****Shared variants found in *fp6*, *fp9* and *fp12***

File S1 is available for download as an Excel file at <http://www.genetics.org/cgi/content/full/genetics.110.119230/DC1>.

Our results and others suggest that mutations accumulation is significant, at least in *C. elegans*, and that the N2 derived strains that exist in different laboratories can exhibit a very different genomic background. As the identity of these variants may be useful to the *C. elegans* community for WGS analysis simplification (i.e. to filter out and discount these variations as possible candidate mutations), we provide these SNPs as a supporting dataset.

## FILE S2

## Supporting Methods

**Preparation of mutants:** *C. elegans* were cultured using standard methods (BRENNER 1974). We conducted an EMS mutagenesis screen in N2 nematodes carrying a *cog-1::gfp* transgene (PS3662 strain) that localizes GFP expression to the PDA neuron and thus allows us to select mutants that lack PDA (J. Richard, S.Z., N. Fischer, V. Pavet, N. Vaucamps & S.J., submitted). Three mutants belonging to 3 distinct complementation groups were chosen and backcrossed to the original PS3662 strain (6X for *fp6* and *fp12*, and 4X for *fp9*). We recommend that a mutagen introducing typical changes at a high frequency be used, as this facilitates the subsequent causal mutation identification. For example, damage induced by ethane methyl sulfonate (EMS) or *N*-ethyl-*N*-nitrosourea (ENU), two commonly used chemical mutagens, may be detected by the canonical nucleotide transitions they cause. Although the type of mutagen used depends on the organism to be mutagenised, one aspect that impacts on this strategy, alongside a predictable mutation type, is the mutation rate of the mutagen. In the centre of the linked regions for each mutant we sequenced, we observed G/C > A/T nucleotide changes at a frequency of 7-8 per Mb. This would correspond to a frequency of 1 mutation in every ~125 000-143 000 base pairs from a 50 mM EMS dose. In the un-linked regions of the genome, where backcrossing would have removed most, if not all, of the EMS-induced nucleotide changes, we observed between 0-2 typical EMS-induced changes per Mb. Even though a small proportion of these G/C > A/T nucleotide changes may have occurred spontaneously through genetic drift, this particular mutation load presented us with very obvious high-density variation peaks in which to concentrate our search for the causal mutation. However, a lower mutation rate may also suffice. ENU has been reported to induce 0.5-1 mutation in every 100 000 nucleotides in mice (BEIER 2000) and would thus be appropriate for use with our strategy.

**Genetic drift, mixed-origin reference genome and backcrossing:** A number of studies have suggested that natural genomic variations occur between strains of the same species, especially in laboratory conditions. For example, strains of *C. elegans* continuously grown for more than 2 years have been suggested to accumulate as many mutations as after EMS treatment (DENVER *et al.* 2004). The use of WGS has started to provide extensive molecular evidence of the existence of hundreds to thousands of differential variants between the N2 sequenced reference genome and N2 derived laboratory strains has been described (HILLIER *et al.* 2008; SARIN *et al.* 2008). The existence of mutation accumulation and genetic drift represents a challenge to mutation identification using strategies that involve comparison of the genome sequence of mutants to a reference genome, considering that, in addition to mutagenesis, the mutants may have accumulated other new variants spontaneously. In addition, a reference genome can have been made from an assembly of a number of different individuals (as is the case for the ongoing Zebrafish genome [www.sanger.ac.uk/Projects/D\_rerio]). However, genetic drift or a mixed-origin reference genome do not represent an issue for mutation identification using our strategy, as the mutant genomes are compared between each other for identification and removal of background variants. This strategy vastly increases the overall robustness of mutation identification by minimizing false-positive and false-negative results caused by reference genome errors. We recommend backcrossing to the original strain that was subjected to mutagenesis. Doing so ensures that all mutant strains will share the same background variation, which can be subsequently subtracted. Outcrossing of the mutant strains to another wild-type isolate is also possible, but may yield more than one region of high density variation: one around the causal mutation and at least one around any other genomic locus that has to be kept in the mutant strain, such as the integration site of a reporter transgene. The number of high-density regions increases with the number of loci that need to be kept during outcrossing. We believe that the risk of having a mixed variants signature when another strain than the original strain is used to outcross is very low if outcrossing has been performed thoroughly (4X should be enough based on our experience of removing EMS-induced changes outside of linked genomic regions). Depending on the speed of genetic drift within a given species, backcrossing mutants from a mutagenesis screen in a timely manner with the original un-mutagenised strain will minimize drift. If backcrossing cannot be performed directly after the screen and if, like *C. elegans*, populations can be frozen and retrieved at a latter time, we recommend to keep a frozen aliquot of the original strain used for the screen and freeze the mutants retrieved directly after the screen. We also recommend to backcross multiple mutants in parallel if they are to be sequenced together.

**Preparation of genomic DNA and genome sequencing:** Genomic DNA was prepared from populations of each mutant using the Gentra Puregene Kit (Qiagen). 10 mg of genomic DNA was fragmented by nebulisation (according to Illumina instructions) to obtain fragments in the range of 500bp in size. Sequencing libraries were made according to the Illumina protocol. The three paired-end libraries were sequenced at the IGBMC sequencing platform on the Illumina GAII as 57-bp paired end reads, following the manufacturer's protocols. Each mutant was sequenced on two flow cell lanes producing coverage of 52.2-55.3X for the 3 mutants across the genome (SI table 2). Image analysis and base calling was performed with Illumina Pipeline version 1.6 with default parameters.

**Analysis software:** Sequences were mapped to *E. coli* strain 536 using Bowtie (LANGMEAD *et al.* 2009) version 0.12.0. Subsequently, short read alignment and variant calling were performed using MAQGene software (BIGELOW *et al.* 2009) revision 33. Mutant reads were aligned against the N2 reference genome (wormbase.org version WS201). MAQGene was used with default parameters except for the max distance between two paired reads which was set to 1000. Comparison of called variants between mutants was performed with custom Perl scripts. Before filtering out common nucleotide variants between our mutants we observed between 2 336 and 2 457 single-nucleotide differences between our mutants and the N2 reference genome. After this step, the number of variations was dramatically reduced to between 415 to 488 nucleotides, thus eliminating approximately 2 000 point mutations as potential candidates for our causal mutation. This result strongly

emphasizes the advantage of conducting WGS on two or more mutants side-by-side, as reference genomes may contain many nucleotide variations when compared to organisms sequenced from the laboratory, and as such would confound mutation identification. Alternatively, one may conduct WGS on the original starting strain used for mutagenesis, which could be used to eliminate strain specific variations. However, in the interests of reducing costs it would be more advantageous to directly sequence multiple mutants of the same background instead. Quality filtering involved selecting only those variants with a MAQgene mapping score of 63 with 0 wild-type reads. EMS may cause other genetic changes such as small insertions or deletions (indels); however, for mapping purposes, we concentrated on the most typical EMS-induced change, as these were sufficient to identify a region containing the causal mutation. After the genomic region is identified quality filtering may be removed to reveal all variants (of all quality) detected within the mapped region, thus avoiding false negatives. In our experience, an EMS-induced variant linkage region is still discernable without firstly performing quality filtering suggesting that this step is not absolutely required for our strategy.

**Confirmation of *egl-5(fp6)* allele:** Sanger-based sequencing on *fp6* animals was performed using the forward primer: CAAGCTTCTGCAAGGAATGCCT and the reverse primer: TTACGGTGGACACAACGGGTAT to generate an amplicon of 439bp containing the expected variant. Sequencing on both strands confirmed the presence of the variant. Genetic complementation analysis between *fp6* and *egl-5(n945)* mutants (recessive and null) yielded no complementation. RNAi of *egl-5* by the feeding method was performed as previously described (KAMATH *et al.* 2001) and was conducted in RNAi sensitive *rff-3(pk1426);cog-1::gfp* animals.

### Supporting literature cited

- BEIER, D. R., 2000 Sequence-based analysis of mutagenized mice. *Mamm Genome* **11**: 594-597.
- BIGELOW, H., M. DOITSIDOU, S. SARIN and O. HOBERT, 2009 MAQGene: software to facilitate C. elegans mutant genome sequence analysis. *Nat Methods* **6**: 549.
- BRENNER, S., 1974 The genetics of *Caenorhabditis elegans*. *Genetics* **77**: 71-94.
- DENVER, D. R., K. MORRIS, M. LYNCH and W. K. THOMAS, 2004 High mutation rate and predominance of insertions in the *Caenorhabditis elegans* nuclear genome. *Nature* **430**: 679-682.
- HILLIER, L. W., G. T. MARTH, A. R. QUINLAN, D. DOOLING, G. FEWELL *et al.*, 2008 Whole-genome sequencing and variant discovery in *C. elegans*. *Nat Methods* **5**: 183-188.
- KAMATH, R. S., M. MARTINEZ-CAMPOS, P. ZIPPERLEN, A. G. FRASER and J. AHRINGER, 2001 Effectiveness of specific RNA-mediated interference through ingested double-stranded RNA in *Caenorhabditis elegans*. *Genome Biol* **2**: RESEARCH0002.
- LANGMEAD, B., C. TRAPNELL, M. POP and S. L. SALZBERG, 2009 Ultrafast and memory-efficient alignment of short DNA sequences to the human genome. *Genome Biol* **10**: R25.
- SARIN, S., S. PRABHU, M. M. O'MEARA, I. PE'ER and O. HOBERT, 2008 *Caenorhabditis elegans* mutant allele identification by whole-genome sequencing. *Nat Methods* **5**: 865-867.

**TABLE S1**  
**Summary of WGS metrics**

|                                                                        | <i>fp6</i>  | <i>fp9</i>  | <i>fp12</i> |
|------------------------------------------------------------------------|-------------|-------------|-------------|
| Total number of reads                                                  | 109 801 600 | 110 380 600 | 106 231 800 |
| % of reads aligned to N2 (wild-type var. Bristol)                      | 88.01       | 92.79       | 93.89       |
| % of reads aligned to <i>E. coli</i> ( <i>C. elegans</i> diet)         | 6.02        | 2.85        | 2.60        |
| % of reads unaligned                                                   | 5.97        | 4.36        | 3.51        |
| % GC content <sup>a</sup>                                              | 37.19       | 37.09       | 35.85       |
| % N content                                                            | 0.01        | 0.01        | 0.01        |
| Number of clusters/lane (2 lanes for each mutant) <sup>b</sup>         | 26 995 200  | 27 572 600  | 26 318 100  |
|                                                                        | 27 905 600  | 27 617 700  | 26 797 800  |
| Number of common variants vs. N2 reference genome (total) <sup>c</sup> | 1317 (1477) | 1352 (1477) | 1311 (1477) |
| % of reads matching multiple locations                                 | 2.54        | 2.51        | 2.22        |

<sup>a</sup>N2 wild-type genome contains ~36% GC content. <sup>b</sup>Number of clusters are shown after being purity filtered during Illumina pipeline. <sup>c</sup>High quality variants (MAQgene mapping score of 63 with 0 wild-type reads) shared in at least 2 of three mutants sequenced. We found that a total of 1477 high quality variants were identified to be common in at least 2 out of the 3 mutants. The common variants from our backcrossed mutants represent SNPs present in our starting strain (PS3662). Note that these numbers highlight how different our starting strain is in terms of variants, from the reference genome. This might be also true for many strains made in the N2 background, a fact that will be confirmed with additional sequencing of other backgrounds.

**TABLE S2****Sequence coverage for each mutant under different WGS conditions**

| Mutant      | Flow cell<br>lanes used | Reads      | Average<br>coverage <sup>a</sup> | % of genome covered at<br>least 1x | % of genome covered at<br>least 5x |
|-------------|-------------------------|------------|----------------------------------|------------------------------------|------------------------------------|
| <i>fp6</i>  | 2                       | paired-end | 52.2                             | 99.915                             | 99.860                             |
| <i>fp6</i>  | 2                       | single-end | 27.2                             | 99.908                             | 99.753                             |
| <i>fp6</i>  | 1                       | paired-end | 25.8                             | 99.901                             | 99.706                             |
| <i>fp6</i>  | 1                       | single-end | 13.6                             | 99.871                             | 98.054                             |
| <i>fp9</i>  | 2                       | paired-end | 55.3                             | 99.914                             | 99.861                             |
| <i>fp9</i>  | 2                       | single-end | 28.9                             | 99.908                             | 99.741                             |
| <i>fp9</i>  | 1                       | paired-end | 27.7                             | 99.902                             | 99.696                             |
| <i>fp9</i>  | 1                       | single-end | 14.7                             | 99.871                             | 98.041                             |
| <i>fp12</i> | 2                       | paired-end | 54.1                             | 99.920                             | 99.881                             |
| <i>fp12</i> | 2                       | single-end | 28.1                             | 99.918                             | 99.827                             |
| <i>fp12</i> | 1                       | paired-end | 26.8                             | 99.910                             | 99.793                             |
| <i>fp12</i> | 1                       | single-end | 14.1                             | 99.896                             | 98.918                             |

<sup>a</sup> Average coverage is calculated by the mean number of times every nucleotide of the genome is sequenced. Distribution of coverage for 2-lanes paired sequencing is shown in Figure S1. *C. elegans* genomes size is ~100 Mb.

**TABLE S3****Candidates mutations in the *fp6* linked region**

| Chromosome position | Type              | Class           | Parent feature                |
|---------------------|-------------------|-----------------|-------------------------------|
| 5942012             | G/C>A/T           | Missense        | F25B5.4                       |
| 6331680             | G/C>A/T           | 5' UTR          | C56G2.4.                      |
| <b>7816050</b>      | <b>G/C&gt;A/T</b> | <b>Missense</b> | <b>C08C3.1 (<i>egl-5</i>)</b> |
| 8487391             | G/C>A/T           | Missense        | F42H10.3                      |
| 8765118             | G/C>A/T           | Missense        | PAR2.4                        |
| 10105957            | G/C>A/T           | Missense        | T16H12.8                      |

The variant in C08C3.1 (*egl-5*) (bold) was confirmed to be the causal mutation (see Figure S2). Importantly, we not only assessed canonical EMS induced nucleotide changes within the mapped region, but also took into consideration any other atypical EMS-inducible mutation that could have caused the Y-to-PDA defective phenotype (e.g. indels). However, no other types of mutations were found to affect gene products (data not shown).

**TABLE S4****Comparison of sequence coverage<sup>a</sup> and number of mutants needed to perform our cloning strategy in*****fp6***

| Flow cell<br>lanes used <sup>b</sup> | Reads      | Mutants compared      | <i>fp6</i> linked region | Number of<br>candidates <sup>c</sup> | true <i>fp6</i><br>allele<br>identified |
|--------------------------------------|------------|-----------------------|--------------------------|--------------------------------------|-----------------------------------------|
| 2                                    | paired-end | <i>fp6, fp9, fp12</i> | 5811728-10105957Mb       | 6                                    | Yes                                     |
| 2                                    | single-end | <i>fp6, fp9, fp12</i> | 5811728-11638999Mb       | 6                                    | Yes                                     |
| 1                                    | paired-end | <i>fp6, fp9, fp12</i> | 5811728-10105957Mb       | 6                                    | Yes                                     |
| 1                                    | single-end | <i>fp6, fp9, fp12</i> | 3615997-10105957Mb       | 6                                    | Yes                                     |
| 2                                    | paired-end | <i>fp6, fp9</i>       | 5811728-10105957Mb       | 6                                    | Yes                                     |
| 2                                    | single-end | <i>fp6, fp9</i>       | 3468244-11638999Mb       | 6                                    | Yes                                     |
| 1                                    | paired-end | <i>fp6, fp9</i>       | 3615997-11638999Mb       | 6                                    | Yes                                     |
| 1                                    | single-end | <i>fp6, fp9</i>       | 2405323-10501170Mb       | 6                                    | Yes                                     |
| 2                                    | paired-end | <i>fp6, fp12</i>      | 5811728-10105957Mb       | 6                                    | Yes                                     |
| 2                                    | single-end | <i>fp6, fp12</i>      | 5811728-11638999Mb       | 6                                    | Yes                                     |
| 1                                    | paired-end | <i>fp6, fp12</i>      | 5811728-10105957Mb       | 6                                    | Yes                                     |
| 1                                    | single-end | <i>fp6, fp12</i>      | 3615997-10105957Mb       | 6                                    | Yes                                     |

<sup>a</sup>Sequence coverage for each WGS scenario (number of lanes and reads used) is shown in Table S2. <sup>b</sup>Per mutant. The Illumina Genome Analyzer II flow cell contains 8 lanes in total. <sup>c</sup>In all cases, 5 missense mutations and 1 5'UTR mutation were identified in *fp6* (Table S3). We also identified obvious high-density variant regions for *fp9* (ChrX:7.74Mb-14.85Mb) and *fp12* (ChrX:4.60Mb-5.88Mb).
