# Supplementary material for: A Strategy for Direct Mapping and Identification of Mutations by Whole-Genome Sequencing
Source: Oxford University Press journal article supplement (doi:10.1534/genetics.110.119230), 2010-07-08
Supplement: tables2.pdf [file tables2.pdf]

**TABLE S2****Sequence coverage for each mutant under different WGS conditions**

| Mutant      | Flow cell<br>lanes used | Reads      | Average<br>coverage <sup>a</sup> | % of genome covered at<br>least 1x | % of genome covered at<br>least 5x |
|-------------|-------------------------|------------|----------------------------------|------------------------------------|------------------------------------|
| <i>fp6</i>  | 2                       | paired-end | 52.2                             | 99.915                             | 99.860                             |
| <i>fp6</i>  | 2                       | single-end | 27.2                             | 99.908                             | 99.753                             |
| <i>fp6</i>  | 1                       | paired-end | 25.8                             | 99.901                             | 99.706                             |
| <i>fp6</i>  | 1                       | single-end | 13.6                             | 99.871                             | 98.054                             |
| <i>fp9</i>  | 2                       | paired-end | 55.3                             | 99.914                             | 99.861                             |
| <i>fp9</i>  | 2                       | single-end | 28.9                             | 99.908                             | 99.741                             |
| <i>fp9</i>  | 1                       | paired-end | 27.7                             | 99.902                             | 99.696                             |
| <i>fp9</i>  | 1                       | single-end | 14.7                             | 99.871                             | 98.041                             |
| <i>fp12</i> | 2                       | paired-end | 54.1                             | 99.920                             | 99.881                             |
| <i>fp12</i> | 2                       | single-end | 28.1                             | 99.918                             | 99.827                             |
| <i>fp12</i> | 1                       | paired-end | 26.8                             | 99.910                             | 99.793                             |
| <i>fp12</i> | 1                       | single-end | 14.1                             | 99.896                             | 98.918                             |

<sup>a</sup> Average coverage is calculated by the mean number of times every nucleotide of the genome is sequenced. Distribution of coverage for 2-lanes paired sequencing is shown in Figure S1. *C. elegans* genomes size is ~100 Mb.
