# Supplementary material for: A Strategy for Direct Mapping and Identification of Mutations by Whole-Genome Sequencing
Source: Oxford University Press journal article supplement (doi:10.1534/genetics.110.119230), 2010-07-08
Supplement: tables3.pdf [file tables3.pdf]

**TABLE S3****Candidates mutations in the *fp6* linked region**

| Chromosome position | Type              | Class           | Parent feature                |
|---------------------|-------------------|-----------------|-------------------------------|
| 5942012             | G/C>A/T           | Missense        | F25B5.4                       |
| 6331680             | G/C>A/T           | 5' UTR          | C56G2.4.                      |
| <b>7816050</b>      | <b>G/C&gt;A/T</b> | <b>Missense</b> | <b>C08C3.1 (<i>egl-5</i>)</b> |
| 8487391             | G/C>A/T           | Missense        | F42H10.3                      |
| 8765118             | G/C>A/T           | Missense        | PAR2.4                        |
| 10105957            | G/C>A/T           | Missense        | T16H12.8                      |

The variant in C08C3.1 (*egl-5*) (bold) was confirmed to be the causal mutation (see Figure S2). Importantly, we not only assessed canonical EMS induced nucleotide changes within the mapped region, but also took into consideration any other atypical EMS-inducible mutation that could have caused the Y-to-PDA defective phenotype (e.g. indels). However, no other types of mutations were found to affect gene products (data not shown).
