# Supplementary material for: A Strategy for Direct Mapping and Identification of Mutations by Whole-Genome Sequencing
Source: Oxford University Press journal article supplement (doi:10.1534/genetics.110.119230), 2010-07-08
Supplement: tables4.pdf [file tables4.pdf]

**TABLE S4****Comparison of sequence coverage<sup>a</sup> and number of mutants needed to perform our cloning strategy in*****fp6***

| Flow cell lanes used <sup>b</sup> | Reads      | Mutants compared      | <i>fp6</i> linked region | Number of candidates <sup>c</sup> | true <i>fp6</i> allele identified |
|-----------------------------------|------------|-----------------------|--------------------------|-----------------------------------|-----------------------------------|
| 2                                 | paired-end | <i>fp6, fp9, fp12</i> | 5811728-10105957Mb       | 6                                 | Yes                               |
| 2                                 | single-end | <i>fp6, fp9, fp12</i> | 5811728-11638999Mb       | 6                                 | Yes                               |
| 1                                 | paired-end | <i>fp6, fp9, fp12</i> | 5811728-10105957Mb       | 6                                 | Yes                               |
| 1                                 | single-end | <i>fp6, fp9, fp12</i> | 3615997-10105957Mb       | 6                                 | Yes                               |
| 2                                 | paired-end | <i>fp6, fp9</i>       | 5811728-10105957Mb       | 6                                 | Yes                               |
| 2                                 | single-end | <i>fp6, fp9</i>       | 3468244-11638999Mb       | 6                                 | Yes                               |
| 1                                 | paired-end | <i>fp6, fp9</i>       | 3615997-11638999Mb       | 6                                 | Yes                               |
| 1                                 | single-end | <i>fp6, fp9</i>       | 2405323-10501170Mb       | 6                                 | Yes                               |
| 2                                 | paired-end | <i>fp6, fp12</i>      | 5811728-10105957Mb       | 6                                 | Yes                               |
| 2                                 | single-end | <i>fp6, fp12</i>      | 5811728-11638999Mb       | 6                                 | Yes                               |
| 1                                 | paired-end | <i>fp6, fp12</i>      | 5811728-10105957Mb       | 6                                 | Yes                               |
| 1                                 | single-end | <i>fp6, fp12</i>      | 3615997-10105957Mb       | 6                                 | Yes                               |

<sup>a</sup>Sequence coverage for each WGS scenario (number of lanes and reads used) is shown in Table S2. <sup>b</sup>Per mutant. The Illumina Genome Analyzer II flow cell contains 8 lanes in total. <sup>c</sup>In all cases, 5 missense mutations and 1 5'UTR mutation were identified in *fp6* (Table S3). We also identified obvious high-density variant regions for *fp9* (ChrX:7.74Mb-14.85Mb) and *fp12* (ChrX:4.60Mb-5.88Mb).
